# Supplementary material
Source: HighWire-hosted journal article supplement (https://erj.ersjournals.com/content/55/5/9951381)

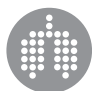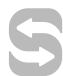

SHAREABLE PDF

**“Detection of SV40 like viral DNA and viral antigens in malignant pleural mesothelioma.” M. Ramael, J. Nagels, H. Heylen, S. De Schepper, J. Paulussen, M. De Maeyer and C. Van Haesendonck. *Eur Respir J* 1999; 14: 1381–1386.**

*From the authors:*

We reported in a previous paper on the possible association of simian vacuolating virus 40 (SV40)-like DNA and protein in malignant mesothelioma using the primed *in situ* labelling (PRINS) method with SVrev and SV2for, as well as a general polyomavirus primer PYVrev and immunohistochemistry using the antibody PAb280 [1]. As some concerns were raised regarding the specificity of the methods used, we felt it necessary to provide an explanatory clarifying note, including some new figures.

Copyright ©ERS 2020

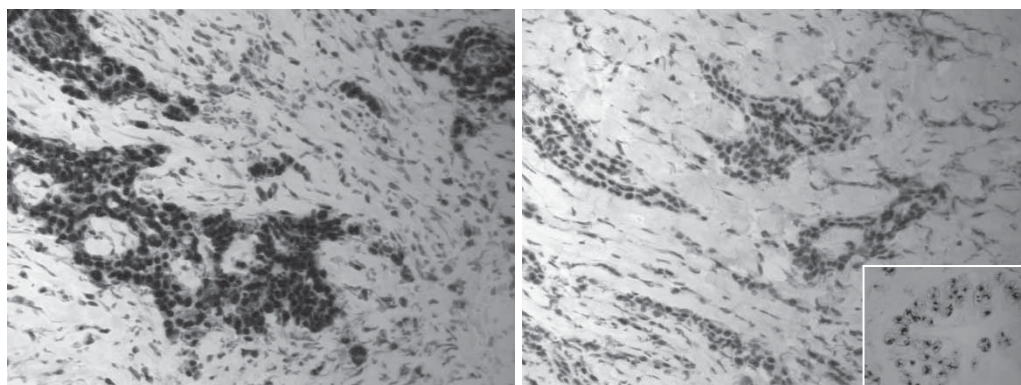

Supplement: inline-supplementary-material-1 [file inline-supplementary-material-1.pdf]
